# Supplementary material for: Maternal High-Fat Diet Aggravates Allergic Asthma in Offspring via Modulating CD4+ T-Cell Differentiation
Source: MDPI journal article supplement (doi:10.3390/nu14122508), 2022-06-16
Supplement: s1 [file s1]

**Table S1. Component of high-fat diet**

| Component                             | Gm%    | Kcal% |
|---------------------------------------|--------|-------|
| Protein                               | 26.2   | 20    |
| Carbohydrate                          | 26.3   | 20    |
| Fat                                   | 34.9   | 60    |
| Total (kcal/gm)                       | 5.24   | 100   |
| Component of high fat diet:           |        |       |
| Component                             | Gm     | Kcal  |
| Casein, 80 Mesh                       | 200    | 800   |
| L-Cystine                             | 3      | 12    |
| Corn Starch                           | 0      | 0     |
| Maltodextrin 10                       | 125    | 500   |
| Sucrose                               | 68.8   | 275.2 |
| Cellulose, BW200                      | 50     | 0     |
| Soybean Oil                           | 25     | 225   |
| Lard                                  | 245    | 2205  |
| Mineral Mix, S10026                   | 10     | 0     |
| DiCalcium Phosphate                   | 13     | 0     |
| Calcium Carbonate                     | 5.5    | 0     |
| Potassium Citrate, 1 H <sub>2</sub> O | 16.5   | 0     |
| Vitamin Mix, V10001                   | 10     | 40    |
| Choline Bitartrate                    | 2      | 0     |
| FD&C Blue Dye                         | 0.05   | 0     |
| Total                                 | 773.85 | 4057  |

Typical analysis of cholesterol in lard = 0.95 mg/gram.

**Table S2. Sequences for real-time PCR primers in this study**

| Gene name                                | Sequences (5'-3')        |
|------------------------------------------|--------------------------|
| Mouse <i>Rpl13a</i> -F                   | GGGCAGGTTCTGGTATTGGAT    |
| Mouse <i>Rpl13a</i> -R                   | GGCTCGGAAATGGTAGGGG      |
| Mouse <i>Il-4</i> -F                     | TTGTCAT CCTGCTCTTCTTTCTC |
| Mouse <i>Il-4</i> -R                     | CAGGAAGTCTTTCAGTGATGTGG  |
| Mouse <i>Il-5</i> -F                     | CTCTGTTGACAAGCAATGAGACG  |
| Mouse <i>Il-5</i> -R                     | TCTTCAGTATGTCTAGCCCCTG   |
| Mouse <i>Il-10</i> -F                    | GCCAAGCCTTATCGGAAATG     |
| Mouse <i>Il-10</i> -R                    | TCTTCACCTGCTCCACTG       |
| Mouse <i>Il-13</i> -F                    | CCTGGCTCTTGCTTGCCTT      |
| Mouse <i>Il-13</i> -R                    | GGTCTTGTGTGATGTTGCTCA    |
| Mouse <i>Ifng</i> -F                     | ATGAACGCTACACACTGCATC    |
| Mouse <i>Ifng</i> -R                     | CCATCCTTTTGCCAGTTCCTC    |
| Mouse <i>klf2</i> -F                     | GAGCCTATCTTGCCGTCCTTT    |
| Mouse <i>klf2</i> -R                     | CACGTTGTTTAGGTCCTCATCC   |
| Mouse <i>p53</i> -F                      | CTCTCCCCCGCAAAAGAAAAA    |
| Mouse <i>p53</i> -R                      | CGGAACATCTCGAAGCGTTTA    |
| Mouse <i>hif1<math>\alpha</math></i> -F  | ACCTTCATCGGAAACTCCAAAG   |
| Mouse <i>hif1<math>\alpha</math></i> -R  | CTGTTAGGCTGGGAAAAGTTAGG  |
| Mouse <i>cyclind2</i> -F                 | GAGTGGGAACTGGTAGTGTTG    |
| Mouse <i>cyclind2</i> -R                 | CGCACAGAGCGATGAAGGT      |
| Mouse <i>cyclind3</i> -F                 | CGAGCCTCCTACTTCCAGTG     |
| Mouse <i>cyclind3</i> -R                 | GGACAGGTAGCGATCCAGGT     |
| Human <i><math>\beta</math>-actin</i> -F | CCAACCGCGAGAAGATGA       |
| Human <i><math>\beta</math>-actin</i> -R | CCAGAGGCGTACAGGGATAG     |
| Human <i>Il-4</i> -F                     | CCAAGTCTTCCCCCTCTG       |
| Human <i>Il-4</i> -R                     | TCTGTTACGGTCAACTCGGTG    |
| human <i>Il-5</i> -F                     | TGGAGCTGCCTACGTGTATG     |
| human <i>Il-5</i> -R                     | TTCGATGAGTAGAAAGCAGTGC   |
| human <i>Il-13</i> -F                    | GAGGATGCTGAGCGGATTCTG    |
| human <i>Il-13</i> -R                    | CACCTCGATTTTGGTGTCTCG    |

|                      |                         |
|----------------------|-------------------------|
| human <i>Ifng</i> -F | TCGGTAACTGACTTGAATGTCCA |
| human <i>Ifng</i> -R | TCGCTTCCCTGTTTTAGCTGC   |

**Table S3. Sequences for mouse bisulfite PCR primers in this study**

| Gene name                        | Sequences (5'-3')                    |
|----------------------------------|--------------------------------------|
| <i>Il4</i> promoter 1 -F         | TTGTAAGATTAGTTGGTTTAGGATG            |
| <i>Il4</i> promoter 1 -R         | TTTCAACATAAAAAATTACACCATA            |
| <i>Il4</i> promoter 2 -F         | GTTAGTATTGTATTGTTAGTATTTTTTGAT       |
| <i>Il4</i> promoter 2 -R         | ATCTCTTAACTTTATCCCTAATCCTA           |
| <i>Il4</i> CNS 1 -F              | TATAAGGGTTGAGGAAGAGTAATGTAGTTTTTATAT |
| <i>Il4</i> CNS 1 -R              | CACTTTAACTAATCAAACCTAAACTATATCCATA   |
| <i>Il4</i> intron 1 and exon 2-F | TGGTTGAGGTAGGATTAGGGATAAAG           |
| <i>Il4</i> intron 1 and exon 2-R | CCTCCAAATATACCACAACAAACC             |

**Table S4. Sequences for human bisulfite PCR primers in this study**

| Gene name                | Sequences (5'-3')                       |
|--------------------------|-----------------------------------------|
| <i>Il4</i> promoter 1 -F | AAATTTATAGGGAGGTTTAGGTATAGTG            |
| <i>Il4</i> promoter 1 -R | TTCTCCTACCTCAACCTCCCCRAATAACTA          |
| <i>Il4</i> promoter 2 -F | GGTTTGATTTTATAGGAATATTTTATTTGTTTGTG     |
| <i>Il4</i> promoter 2 -R | CCCATTAATAAATATCRATTTACAATAACAATATAAAAC |
| <i>Il4</i> promoter 3 -F | TTTAGTAAATGGGGAGATTTATTTTAAATGTTTG      |
| <i>Il4</i> promoter 3 -R | AACCAAAACATACTTAAAAATAAAAAATCAAACCTC    |

**Table S5. Comparison of maternal and neonatal variables**

|                              | CON         | HC          | P value |
|------------------------------|-------------|-------------|---------|
|                              | n(%)        | n(%)        |         |
| Maternal                     |             |             |         |
| Age                          | 31.05±3.02  | 30.83±3.45  | 0.84    |
| Education background         |             |             | 0.56    |
| High school                  | 1(5.00)     | 3(16.67)    |         |
| Undergraduate                | 16(80.00)   | 13(72.22)   |         |
| Graduate                     | 3(15.00)    | 2(11.11)    |         |
| Height (cm)                  | 162.90±5.18 | 161.11±3.63 | 0.23    |
| Pre-pregnancy weight (kg)    | 55.65±7.15  | 57.22±4.99  | 0.44    |
| Pre-pregnancy BMI            | 20.91±1.80  | 22.02±1.60  | 0.05    |
| Gestational weight gain (kg) | 13.97±4.40  | 16.25±4.04  | 0.11    |
| Prenatal BMI                 | 26.14±2.93  | 28.27±2.56  | 0.02*   |
| Gravidity                    |             |             | 0.92    |
| 1                            | 8(40)       | 7(38.89)    |         |
| 2                            | 6(30)       | 4(22.22)    |         |
| ≥3                           | 6(30)       | 7(38.89)    |         |
| Parity                       |             |             | 0.34    |
| 1                            | 10(50.00)   | 12(66.67)   |         |
| 2                            | 10(50.00)   | 6(33.33)    |         |
| Neonatal                     |             |             |         |
| Gestational age              | 38.98±0.75  | 39.35±1.01  | 0.18    |
| Birthweight (kg)             | 3.57±0.48   | 3.71±0.51   | 0.37    |
| Birth length (cm)            | 50.35±1.50  | 50.78±1.40  | 0.37    |
| Sex                          |             |             | 0.52    |
| Male                         | 11(55.00)   | 12(66.67)   |         |
| Female                       | 9(45.00)    | 6(33.33)    |         |

Note: Data were summarized as mean ± SEM. Categorical variables are expressed as a frequency with a proportion. *P* values were determined by two-tailed Student's *t* test or Fisher's exact test, \**P*<0.05.
